# Supplementary material
Source: PubMed Central journal article supplement (PMC7870544)

# 4 weeks post-surgery

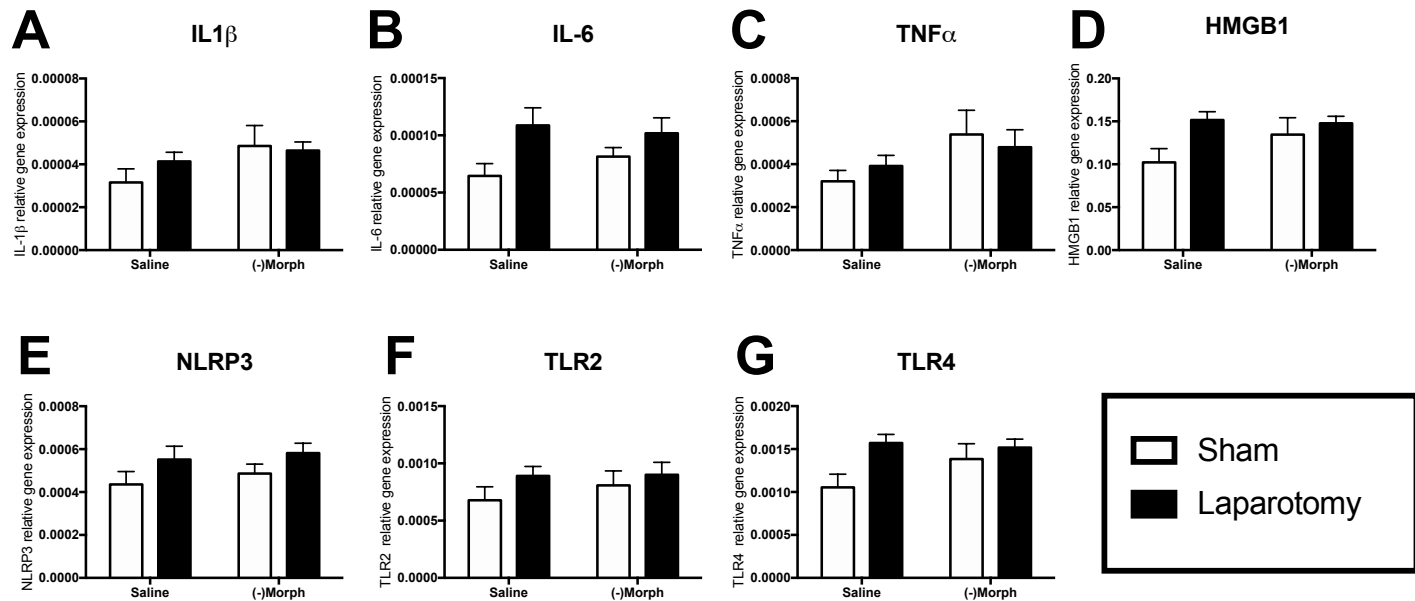

Figure S1

Supplement: NIHMS1649373-supplement-1.pdf [file NIHMS1649373-supplement-1.pdf]

# 8 weeks post-surgery

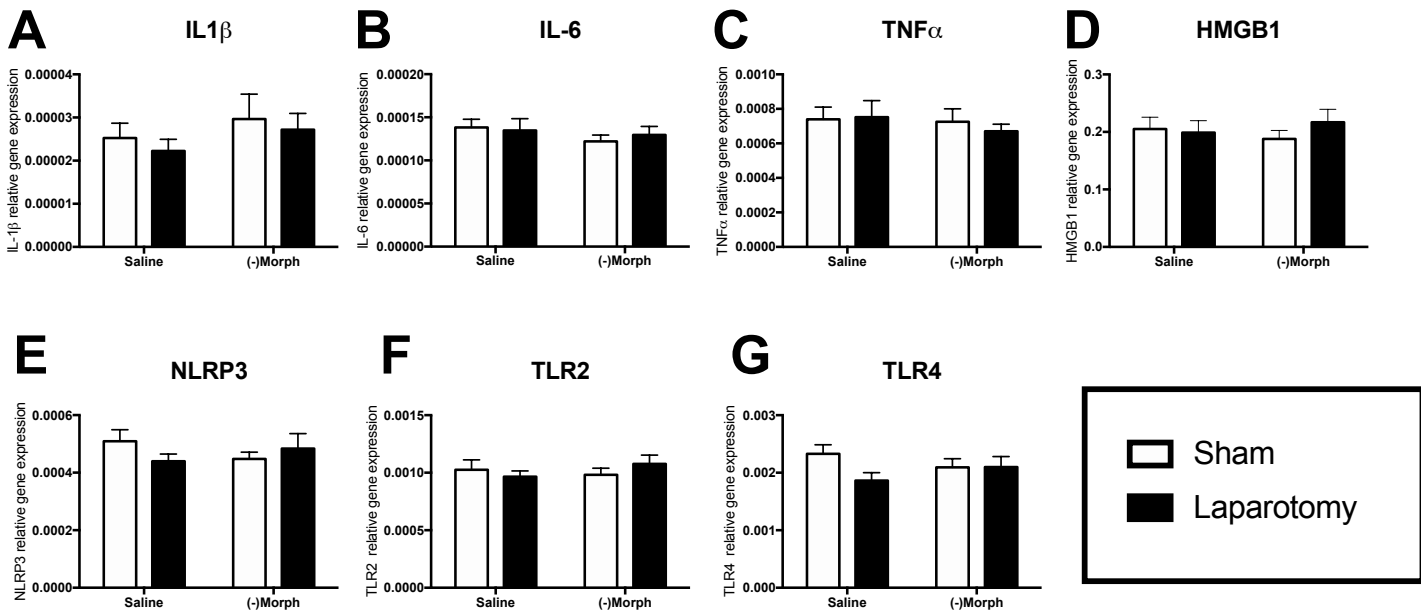

Figure S2

Supplement: NIHMS1649373-supplement-2.pdf [file NIHMS1649373-supplement-2.pdf]
